# Supplementary material for: A maize-like FePO4@MCNT nanowire composite for sodium-ion batteries via a microemulsion technique
Source: Royal Society of Chemistry journal article supplement (doi:10.1039/c4ta00239c), 2014-01-01
Supplement: c4ta00239c1.pdf [file c4ta00239c1.pdf]

## Supplementary Information

### **Maize-like FePO<sub>4</sub>@MCNT nanowire composite for sodium-ion batteries via a microemulsion technique**

Shuojiong Xu,<sup>a</sup> Shiming Zhang,<sup>ab</sup> Junxi Zhang,<sup>\*a</sup> Tian Tan,<sup>a</sup> Yao Liu<sup>a</sup>

*<sup>a</sup>Electrochemical Research Group, Shanghai University of Electric Power, Shanghai, 200090, People's Republic of China.*

*<sup>b</sup>State Key Laboratory of Silicon Materials, Key Laboratory of Advanced Materials and Applications for Batteries of Zhejiang Province & Department of Materials Science and Engineering, Zhejiang University, Hangzhou 310027, People's Republic of China.*

\* Corresponding author. Tel. /Fax. : +86-21-65700719.

E-mail address: zhangjunxi@shiep.edu.cn.

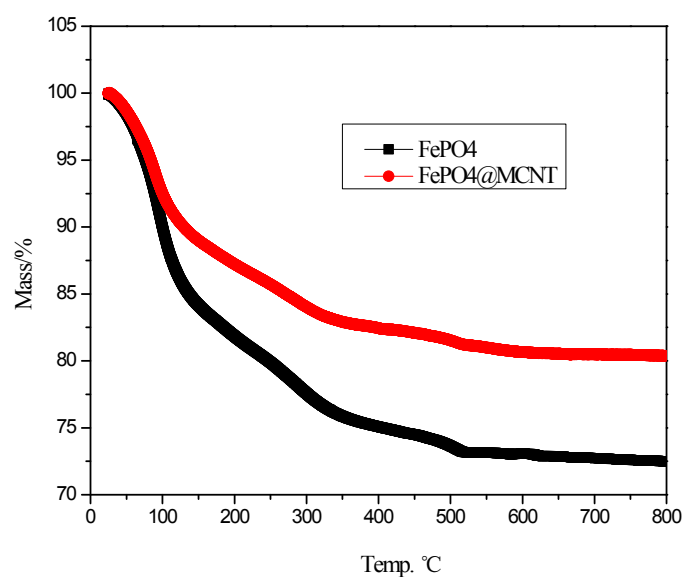

**Fig. S1 TGA curves of FePO<sub>4</sub> and the FePO<sub>4</sub>@MCNT. The samples were tested by TA Q500 Thermogravimetric Analysis. The remaining weight of FePO<sub>4</sub> is 72%, the first weight loss observed below 100°C is about 5~10%, which could be ascribed to the release of adsorbed water on the surface of the sample. The next weight loss from 100°C to 450°C is approximate 20%, which corresponds to the elimination of crystal water. The remaining weight of FePO<sub>4</sub>@MCNT is 80%, which is consistent with the presence of 70% FePO<sub>4</sub> in FePO<sub>4</sub>@MCNT.**

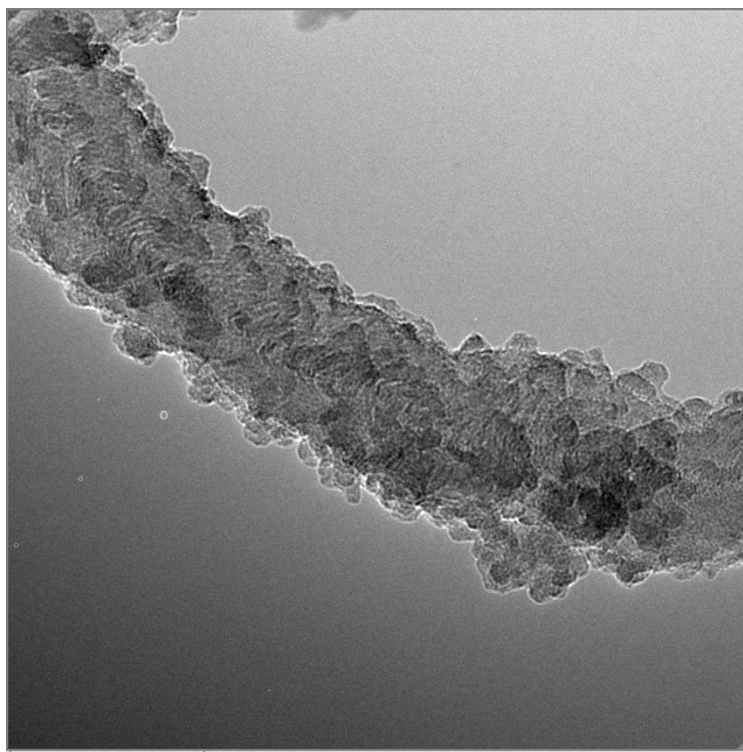

**Fig. S2** TEM image of FePO<sub>4</sub> @ MCNT were acquired on a Philips CM200 FEG transmission electron microscope operated at 200 KV, showing the MCNT was covered with amorphous spherical FePO<sub>4</sub> nanoparticles.

The BET surface areas of samples were measured using Quantachrome Nova Station A by nitrogen sorption at 77K. The surface areas of FePO<sub>4</sub> and FePO<sub>4</sub>@MCNT are 117.691 m<sup>2</sup>/g and 114.927 m<sup>2</sup>/g, respectively. The lower value of FePO<sub>4</sub>@MCNT should be ascribed to one side of amorphous FePO<sub>4</sub> nanoparticle loaded on the MCNT.

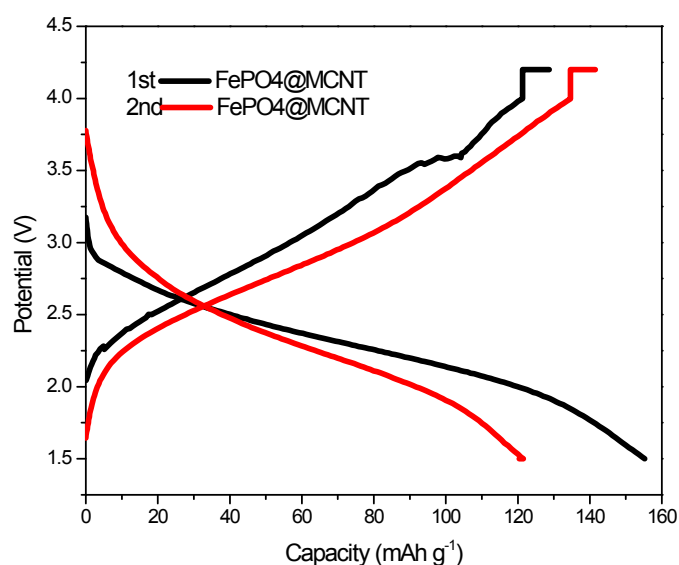

**Fig. S3** The charge and discharge Curves of the initial two cycles of FePO<sub>4</sub>@MCNT at 0.1 C. The composite delivered discharge and charge capacities of 155.2 mAh g<sup>-1</sup> and 128.7 mAh g<sup>-1</sup> in the first cycle; 120.4 mAh g<sup>-1</sup> and 141.5 mAh g<sup>-1</sup> in the second cycle.

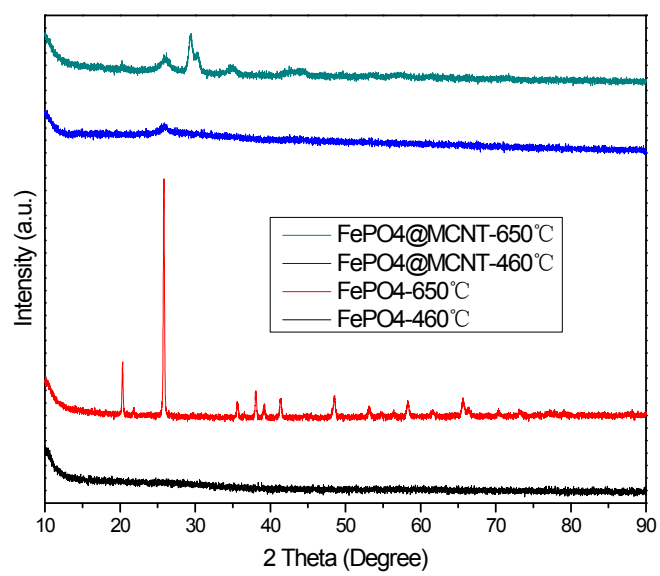

(a)

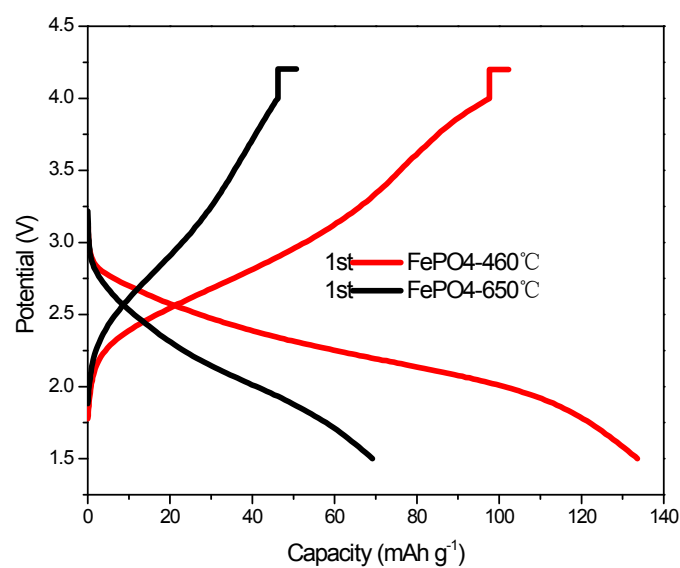

(b)

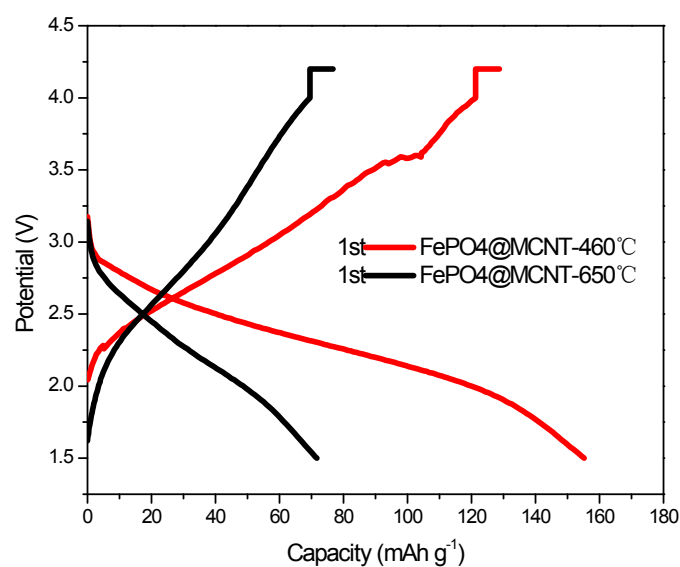

(c)

**Fig. S4 (a) XRD patterns of  $\text{FePO}_4$  and the  $\text{FePO}_4@\text{MCNT}$  composite at different calcination temperatures (460°C, 650°C). (b) The charge-discharge Curves of  $\text{FePO}_4$  at different calcination temperatures. (c) The charge-discharge Curves of the  $\text{FePO}_4@\text{MCNT}$  composite at different calcination temperatures. As shown in Fig. S4 (a), amorphous  $\text{FePO}_4$  completely changes to crystalline trigonal  $\text{FePO}_4$  at 650°C in air. From Fig. S4 (b), the amorphous  $\text{FePO}_4$  delivered discharge and charge capacities of 133.6  $\text{mAh g}^{-1}$  and 102.3  $\text{mAh g}^{-1}$  in the first cycle, but the trigonal  $\text{FePO}_4$  just delivered discharge and charge capacities of**

69.2 mAh g<sup>-1</sup> and 50.7 mAh g<sup>-1</sup>, which is consistent with the poor electrochemical behavior in Li-ion batteries.<sup>28</sup>

It can be seen from Fig. S4 (a) that the FePO<sub>4</sub>@MCNT composite also shows the 26.8° diffraction peak of the MCNTs at 650°C in N<sub>2</sub>. But the other peaks should be ascribed to the carbon thermal reduction of Fe<sup>3+</sup> to Fe<sup>2+</sup>, owing to the MCNTs and organic residues calcined at high temperature in N<sub>2</sub>. As shown in Fig. S4 (c), the FePO<sub>4</sub>@MCNT (650°C) composite only delivered discharge and charge capacities of 71.7 mAh g<sup>-1</sup> and 76.7 mAh g<sup>-1</sup> in the first cycle. It is demonstrated that FePO<sub>4</sub>@MCNT (460°C) composite has better electrochemical performance than FePO<sub>4</sub>@MCNT (650°C).
